# Supplementary material for: Flattening the Curve after the Initial Outbreak of Coronavirus Disease 2019: A Data-Driven Modeling Analysis for the Omicron Pandemic in China
Source: MDPI journal article supplement (doi:10.3390/vaccines11051009), 2023-05-22
Supplement: s1 [file s1]

Table S1. Vaccine efficacy assumption

|             | Outcome             | Susceptible population | People got the first shot | First shot activated | People got the first shot and were ready for the second shot | People got the second shot | Second shot activated | People got the second shot and were ready for the booster (waning status) | People got booster vaccination | Booster shot activated | Waning status after booster vaccination | People recovered from the Omicron infection | People recovered from the Delta infection |
|-------------|---------------------|------------------------|---------------------------|----------------------|--------------------------------------------------------------|----------------------------|-----------------------|---------------------------------------------------------------------------|--------------------------------|------------------------|-----------------------------------------|---------------------------------------------|-------------------------------------------|
| Inactivated | Infection           | 100.0%                 | 100.0%                    | 94.4%                | 94.4%                                                        | 94.4%                      | 90.9%                 | 94.1%                                                                     | 94.1%                          | 83.0%                  | 86.2%                                   | 9.5%                                        | 43.5%                                     |
|             | Onward transmission | 100.0%                 | 100.0%                    | 100.0%               | 100.0%                                                       | 100.0%                     | 100.0%                | 100.0%                                                                    | 100.0%                         | 89.4%                  | 100.0%                                  | 100.0%                                      | 100.0%                                    |
|             | Symptomatic disease | 100.0%                 | 100.0%                    | 88.5%                | 88.5%                                                        | 88.5%                      | 80.4%                 | 87.9%                                                                     | 87.9%                          | 64.5%                  | 72.2%                                   | 3.4%                                        | 6.7%                                      |
|             | Hospitalization     | 100.0%                 | 100.0%                    | 64.4%                | 64.4%                                                        | 64.4%                      | 29.0%                 | 37.0%                                                                     | 37.0%                          | 3.6%                   | 11.1%                                   | 100.0%                                      | 100.0%                                    |
|             | Mortality           | 100.0%                 | 100.0%                    | 81.2%                | 81.2%                                                        | 81.2%                      | 72.2%                 | 75.0%                                                                     | 75.0%                          | 67.1%                  | 68.2%                                   | 100.0%                                      | 100.0%                                    |
| mRNA        | Infection           | 100.0%                 | 100.0%                    | 94.4%                | 94.4%                                                        | 94.4%                      | 90.9%                 | 94.1%                                                                     | 94.1%                          | 83.0%                  | 86.2%                                   | 9.5%                                        | 43.5%                                     |
|             | Onward transmission | 100.0%                 | 100.0%                    | 100.0%               | 100.0%                                                       | 100.0%                     | 100.0%                | 100.0%                                                                    | 100.0%                         | 78.0%                  | 100.0%                                  | 100.0%                                      | 100.0%                                    |
|             | Symptomatic disease | 100.0%                 | 100.0%                    | 88.5%                | 88.5%                                                        | 88.5%                      | 80.4%                 | 87.9%                                                                     | 87.9%                          | 56.6%                  | 66.0%                                   | 3.4%                                        | 6.7%                                      |

|  |                 |        |        |       |       |       |       |       |       |       |       |        |        |
|--|-----------------|--------|--------|-------|-------|-------|-------|-------|-------|-------|-------|--------|--------|
|  | Hospitalization | 100.0% | 100.0% | 64.4% | 64.4% | 64.4% | 29.0% | 37.0% | 37.0% | 3.6%  | 11.1% | 100.0% | 100.0% |
|  | Mortality       | 100.0% | 100.0% | 17.3% | 17.3% | 17.3% | 15.4% | 16.0% | 16.0% | 14.3% | 14.5% | 100.0% | 100.0% |

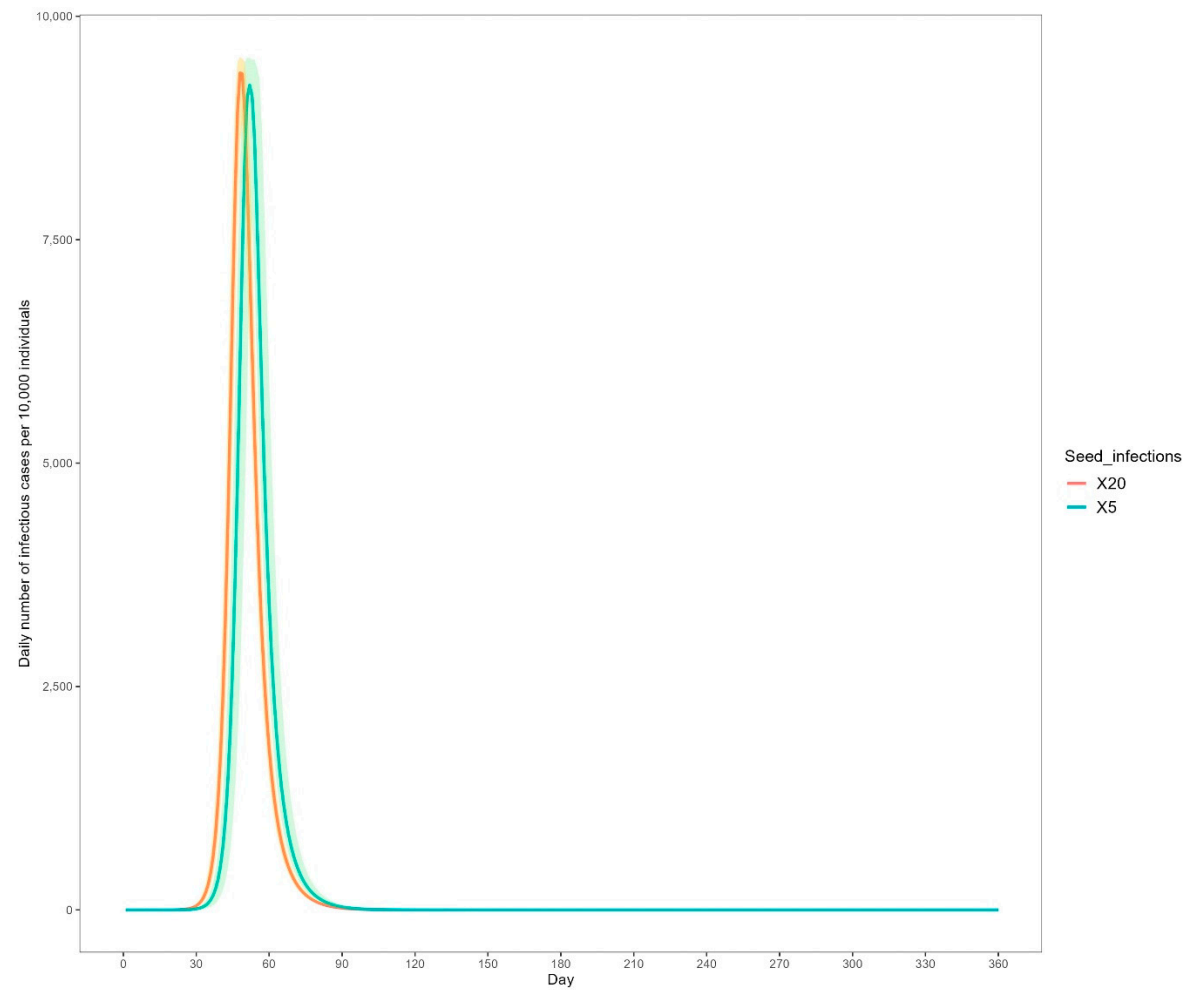

Figure S1. Projected SARS-CoV-2 Omicron burden in infections in China under scenarios with more initial introduced infections compared with baseline (20 vs 5)

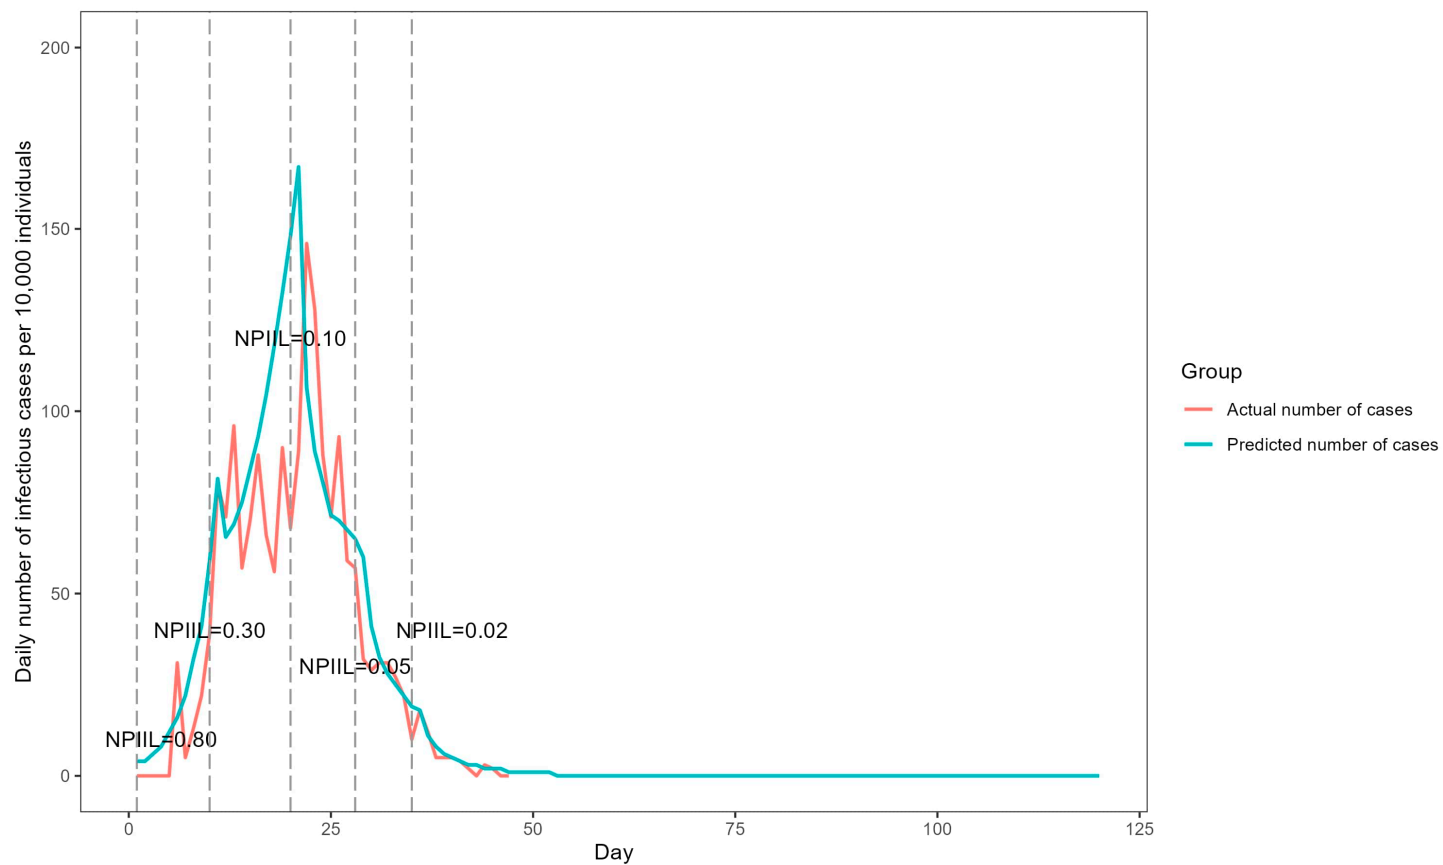

Figure S2. Daily infectious cases of SARS-CoV-2 Omicron variant in Macau

Note:

NPIIL: nonpharmaceutical intervention intensity level

NPIIL are between 0-1. NPIIL equal to 0.01 means the strictest NPI is carried out, and vice versa

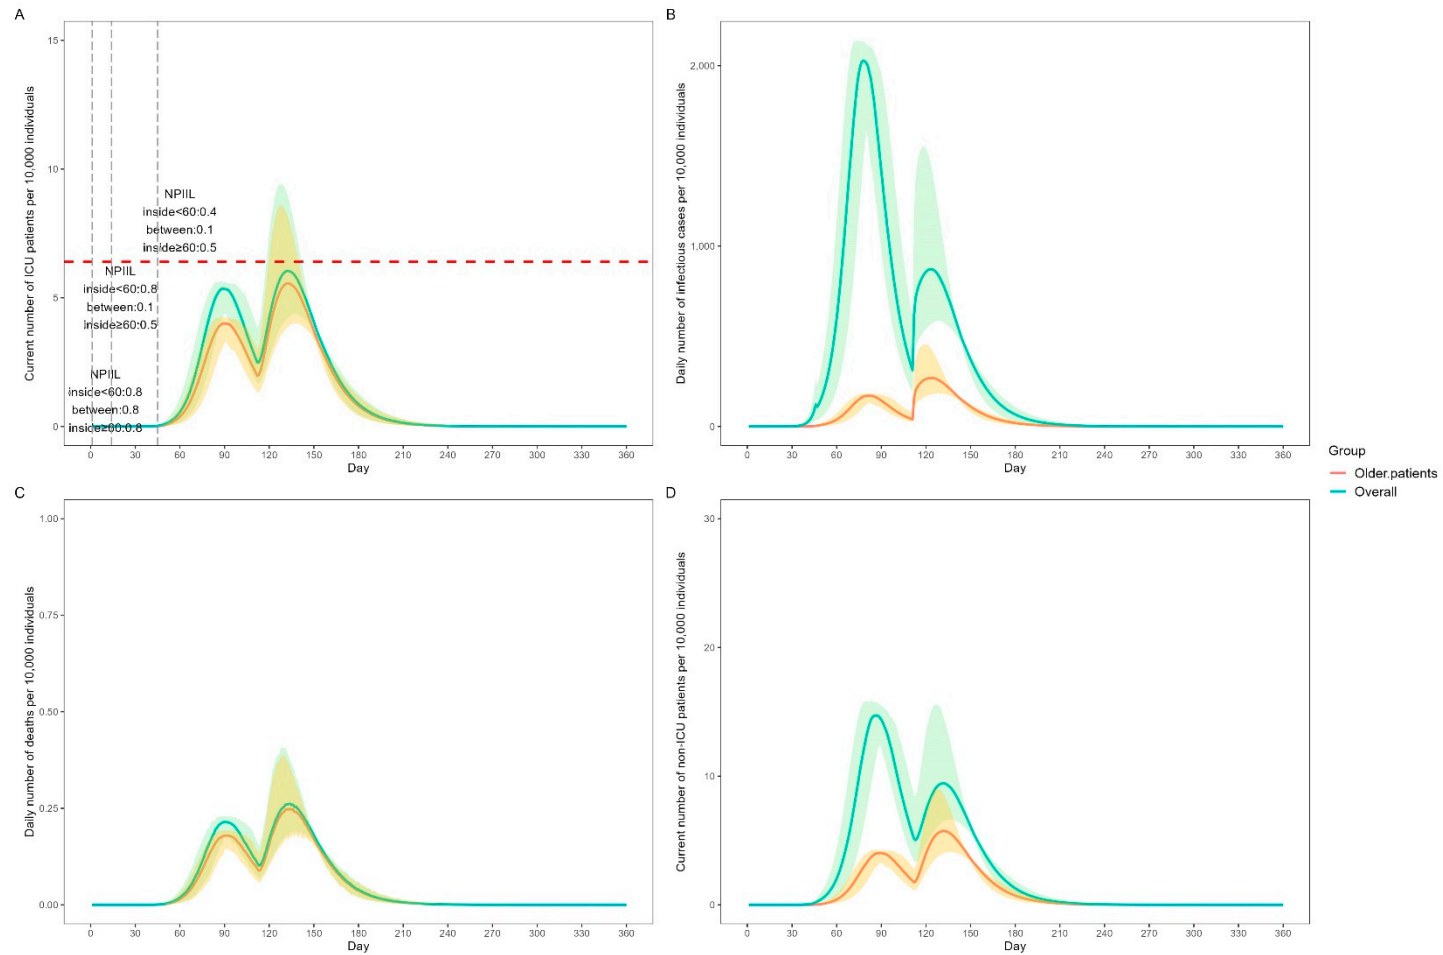

Figure S3. Prediction SARS-CoV-2 Omicron burden using different NPIIL of NIPs mitigation strategies at specific times among different age groups based on the positive scenario.
